# Supplementary material for: Drought Tolerance Conferred to Sugarcane by Association with Gluconacetobacter diazotrophicus: A Transcriptomic View of Hormone Pathways
Source: PLoS One. 2014 Dec 9;9(12):e114744. doi: 10.1371/journal.pone.0114744 (PMC4260876; doi:10.1371/journal.pone.0114744)
Supplement: Table S6 — Selected genes for qRT-PCR validation, primer sequences and Log2 fold changes in Drought and Bacteria&Drought datasets, for both root and shoot tissues. (XLSX) [file pone.0114744.s008.xlsx]

## Sheet: Primers qRT-PCR
Table S6. Selected genes for qRT-PCR validation, primer sequences and Log2 fold changes in Drought and Bacteria&Drought datasets, for both root and shoot tissues.
						Log2FC Drought			Log2FC Bacteria&Drought
Obs	Loci sugarcane	Gene name	ID A. thaliana; O.sativa	Sequence Foward	Sequence Reverse	Root	Shoot		Root	Shoot
	r2_l24079_t1	ACS6	AT4G11280;OS04G48850	AAAACGGGCACACCCTACAG	GGTCCACGCCAGCTAGTCA	1.3	ns		-4.5	-3.09
**not sequenced in CT-R ("exclusive")	r1_l6917_t2	DREB1A	AT4G25480	TGGCGGCTCCACGAGTAG	TGGACTTGGAATTGGATGTGTACTA	1**	2.931		ns	-4.89
	r2_l8437_t21	RD20A	AT2G33380	GGACTGCTCCGTGGATGTG	TGACAACCCCTCCTGGAAAA	ns	2.545		-1.043	ns
no expression validation in roots	r1_l6390_t2	ERD1	AT5G51070	CTTCTTGGCAAATCAGGTCCTT	TTTGGCCCTTGGGATAGGTT	ns	ns		-1.084	2.99
	r1_l1045_t9	ACO	AT1G77330;OS05G05680	GCAATCTATCTACTCGATCGTCTTCA	GAAGTCGATCACGGGAACCA	ns	1.69		-2.27	-1.32
	r2_l4628_t22	EIN4	AT3G04580;OS02G57530	CGAGCGGGATGGAGAAGTAG	TCTGGAGCCTGGACAACATCT	ns	-1.95		-1.45	1.09
	r1_l8174_t1	EIN2	AT5G03280;OS07G06130	GGTGTTACTGGCTCTCCTTTTCAA	CCAATGCAAGCAGCAAGGT	ns	ns		-2.706	-2.06
	r2_l28979_t4	ERF12	AT1G28360;OS05G41760	TGATCCATGATCCCTACTCGATACT	CGATCTCCATGAACGCACAT	ns	2.25		-2.77	-3.36
	r2_l21689_t1	TINY2	AT5G11590;OS10G38000	CCGCAAGTGGTTGATGCA	CCAGCACGTCCCGATTTG	ns	1.68		ns	-2.23
	r1_l33611_t1	ABA2	AT1G52340;OS04G33240	GGGTCCCACTCAGTCTTTGG	CGGCCACAACCTGTTCATC	ns	ns		-1.58	-1.18
	r1_l13141_t2	PYL8	AT5G53160;OS02G15640	CCGAGGGCCAGGTCATCA	TATATCTCCCATCACCGGTCAAG	ns	1.093		-1.279	ns
	r1_l21486_t1	HVA22F	AT2G42820;OS01G52780	GCGCTGACGCTCGTTGTA	CACGTCCGGCGCTACTTC	ns	1.35		ns	-1.61
	r1_l17204_t1	AUX/IAA31	AT3G17600;OS01G18360	AGTGTAAAGAAGCTGAGGATTGCA	AGTGTAAAGAAGCTGAGGATTGCA	ns	1.172		ns	-1.25
	r2_l20466_t16	SAUR24	AT1G75580;OS06G04590	TGGGCCACCAAACAAATGA	CGCGTGCTTGCATTTGC	1.268	ns		-1.928	-4.26
	r1_l14658_t1	SAUR71	AT1G56150;OS03G45850	TGCAGAGATGCGGGATCAG	TCGATCAGCTAGCAGCCAGAT	ns	3.569		ns	-4.36
no melt curve validation	r1_l6310_t1	ILR1	AT1G44350;OS06G47620	CAGTTCCCCACCAGTTCCC	TGGCCAGGAGCTGTAAGACC	ns	-3.698		ns	2.18
